# Supplementary material for: Age-dependent increase of oxidative stress regulates microRNA-29 family preserving cardiac health
Source: PubMed Central journal article supplement (PMC5715159; doi:10.1038/s41598-017-16829-w), 2017-12-04
Supplement: 41598_2017_16829_MOESM1_ESM.pdf [file 41598_2017_16829_MOESM1_ESM.pdf]

**Age-dependent oxidative stress increase regulates microRNA-29 family preserving cardiac health**

Johanna Heid<sup>1,#</sup>, Chiara Cencioni<sup>2,1,#</sup>, Roberto Ripa<sup>3,#</sup>, Mario Baumgart<sup>4,#</sup>, Sandra Atlante<sup>1</sup>, Giuseppina Milano<sup>5,6</sup>, Alessandro Scopece<sup>5</sup>, Carsten Kuenne<sup>7</sup>, Stefan Guenther<sup>7</sup>, Valerio Azzimato<sup>8</sup>, Antonella Farsetti<sup>2</sup>, Giacomo Rossi<sup>9</sup>, Thomas Braun<sup>7</sup>, Giulio Pompilio<sup>5,10</sup>, Fabio Martelli<sup>11</sup>, Andreas M. Zeiher<sup>12</sup>, Alessandro Cellerino<sup>3,\*</sup>, Carlo Gaetano<sup>1,\*</sup>, Francesco Spallotta<sup>1,\*</sup>

1 Division of Cardiovascular Epigenetics, Department of Cardiology, Goethe University, Frankfurt am Main 60596, Germany; E-Mails: johannaheid@yahoo.de (JH); chcencioni@gmail.com (CC); sandra.atlas@yahoo.it (SA); fspallotta@gmail.com (FS).

2 National Research Council, Institute of Cell Biology and Neurobiology (IBCN), Rome 00143, Italy; E-Mail: antonella.farsetti@cnr.it (AF)

3 Scuola Normale Superiore, Laboratory of Biology (Bio@SNS), c/o Istituto di Biofisica del CNR, Pisa 56124, Italy. E-Mails: roberto.ripa@sns.it (RR); alessandro.cellerino@sns.it (AC)

4 Leibniz Institute on Aging - Fritz Lipmann Institute (FLI), Jena 07745, Germany. E-Mail: Mario.Baumgart@leibniz-fli.de (MB)

5 Vascular Biology and Regenerative Medicine Unit, Centro Cardiologico Monzino-IRCCS, Milan 20128, Italy. E-Mails: gmilano@ccfm.it (GM); ascopece@ccfm.it (AS); Giulio.Pompilio@ccfm.it (GP)

6 Laboratory of Cardiovascular Research, Department of Surgery and Anesthesiology, University Hospital Lausanne, Lausanne 1015, Switzerland.

7 ECCPS Bioinformatics and deep sequencing platform, Max Planck Institute for Heart and Lung Research, Bad Nauheim 61231, Germany; E-Mails: carsten.kuenne@mpi-bn.mpg.de (CK); Stefan.Guenther@mpi-bn.mpg.de (SG); thomas.braun@mpi-bn.mpg.de (TB)

8 Integrated Cardio Metabolic Centre, Department of Medicine, Karolinska Institutet. 141 57 Huddinge, Sweden. E-Mail: valerio.azzimato@gmail.com (VA)

9 Department of Veterinary Sciences, Faculty of Veterinary Medicine, University of Camerino, Camerino (MC) 62032, Italy. E-Mail: giacomo.rossi@unicam.it (GR)

10 Dipartimento di Scienze Cliniche e di Comunità, Università degli Studi di Milano, Milan 20122, Italy

11 IRCCS-Policlinico San Donato, Molecular Cardiology Laboratory, San Donato Milanese (MI) 20097, Italy. E-Mail: fabio.martelli@grupposandonato.it (FM)

12 Internal Medicine Clinic III, Department of Cardiology, Goethe University, Frankfurt am Main 60596, Germany; E-Mail: zeiber@em.uni-frankfurt.de (AMZ)

**Running title:** miR-29 protects aging heart

**Corresponding author:**

Prof. Carlo Gaetano MD

Division of Cardiovascular Epigenetics, Department of Cardiology, Goethe University, Frankfurt am Main 60596, Germany

E-Mail: gaetano@em.uni-frankfurt.de; carlo.gaetano@gmail.com; Tel.: +49-69-6301-87963; Fax: +49-69-6301-86095.

**Co-corresponding author:**

Francesco Spallotta, PhD

Division of Cardiovascular Epigenetics, Department of Cardiology, Goethe University, Frankfurt am Main 60596, Germany

E-Mail: fspallotta@gmail.com; Tel.: +49-69-6301-87957; Fax: +49-69-6301-86095.

# JH, CC, RR and MB co-first authors.

\* AC, CG and FS co-senior authors.

**Keywords:** Aging, oxidative stress, heart, fibrosis and microRNAs

**Supplemental figures**

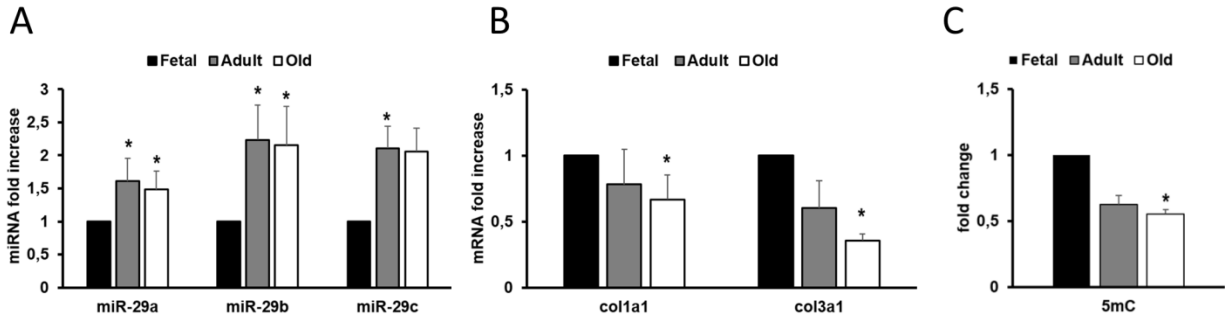

**SUPPL. FIG.1. Analysis of miR-29 and its targets in HCF derived from fetal, adult and old donors**

(A) qRT-PCR analysis of miR-29 family members in HCFs derived from fetal (black bars), adult (gray bars) and old (white bars) donors expressed as fold-change versus fetal samples (n=3). (B) qRT-PCR analysis of col mRNAs in HCFs derived from fetal (black bars; n=3), adult (gray bars; n=6) and old (white bars; n=6) donors expressed as fold-change versus fetal samples. (C) Global DNA methylation quantification of 5mC in HCFs derived from fetal (black bars; n=3), adult (gray bars; n=3) and old (white bars; n=6) donors. \*p<0.05 Vs fetal.

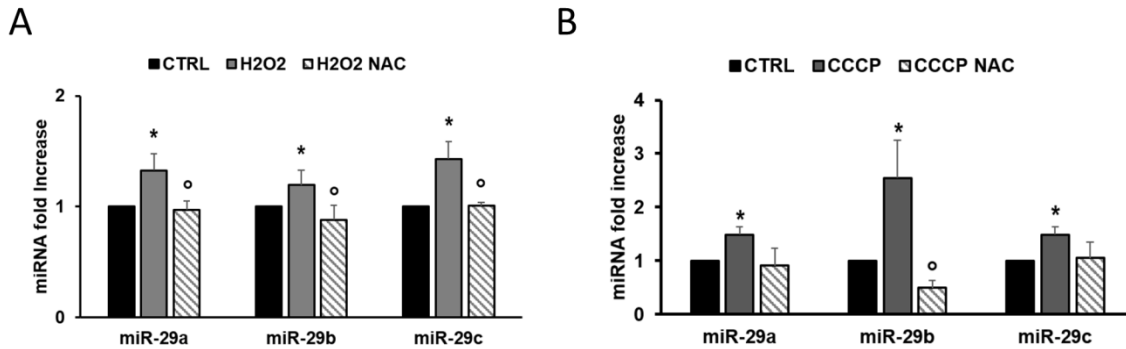

**SUPPL. FIG.2 Oxidative stress affects miR-29 family in cardiac cells**

(A) qRT-PCR analysis of miR-29 family members in differentiated H9C2 rat cardiomyoblasts cultured in control conditions (CTRL; black bars; n=3), in the presence of H<sub>2</sub>O<sub>2</sub> (gray bars; n=3) and of H<sub>2</sub>O<sub>2</sub> NAC (striped bars; n=3) expressed as fold-change versus control samples. (B) qRT-PCR analysis of miR-29 family members in HCF prior (CTRL; black bars; n=6) and after treatment with Carbonyl cyanide m-chlorophenyl hydrazine (CCCP; gray bars; n=6) and CCCP NAC (striped bars; n=3) expressed as fold-change versus control samples. \*p<0.05 Vs control; °p<0.05 Vs CCCP.

**A**

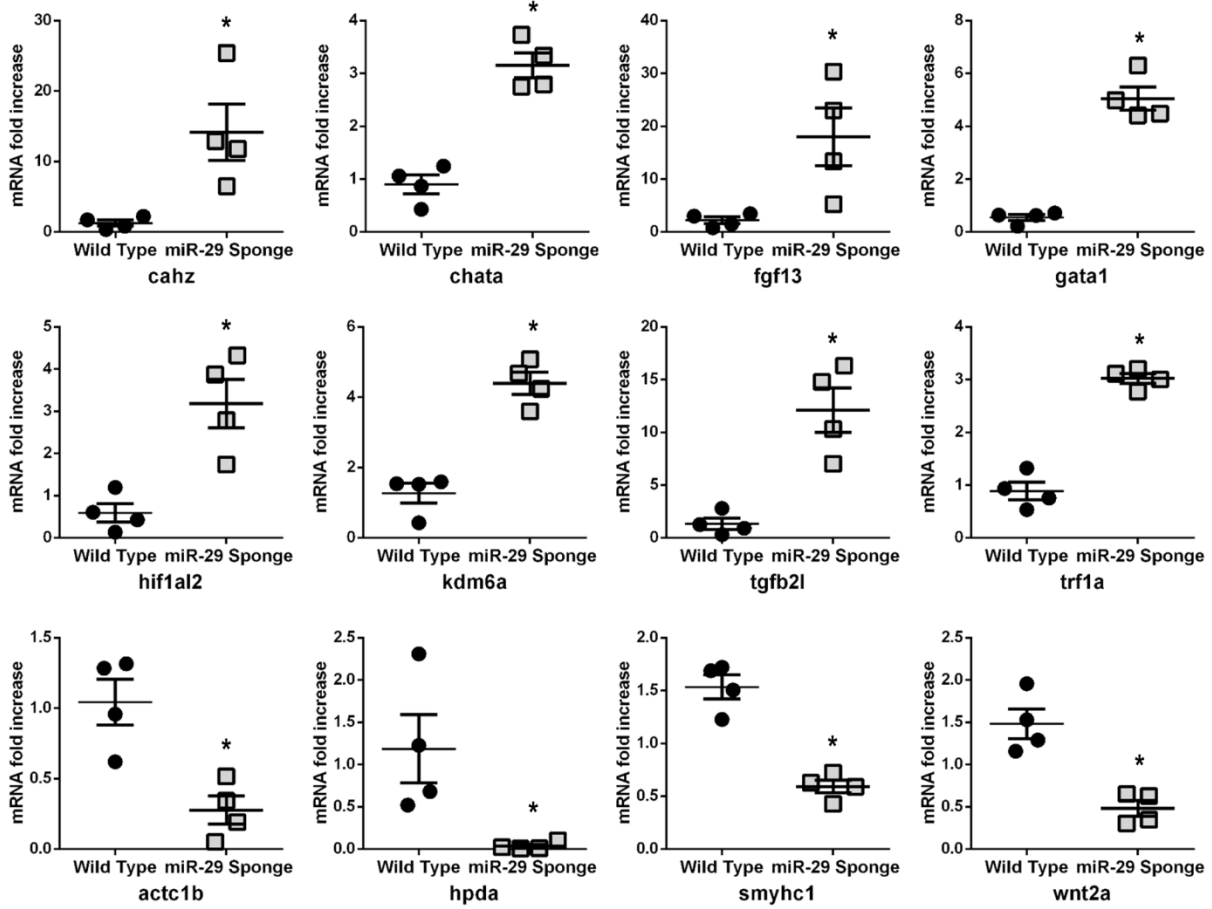

**B**

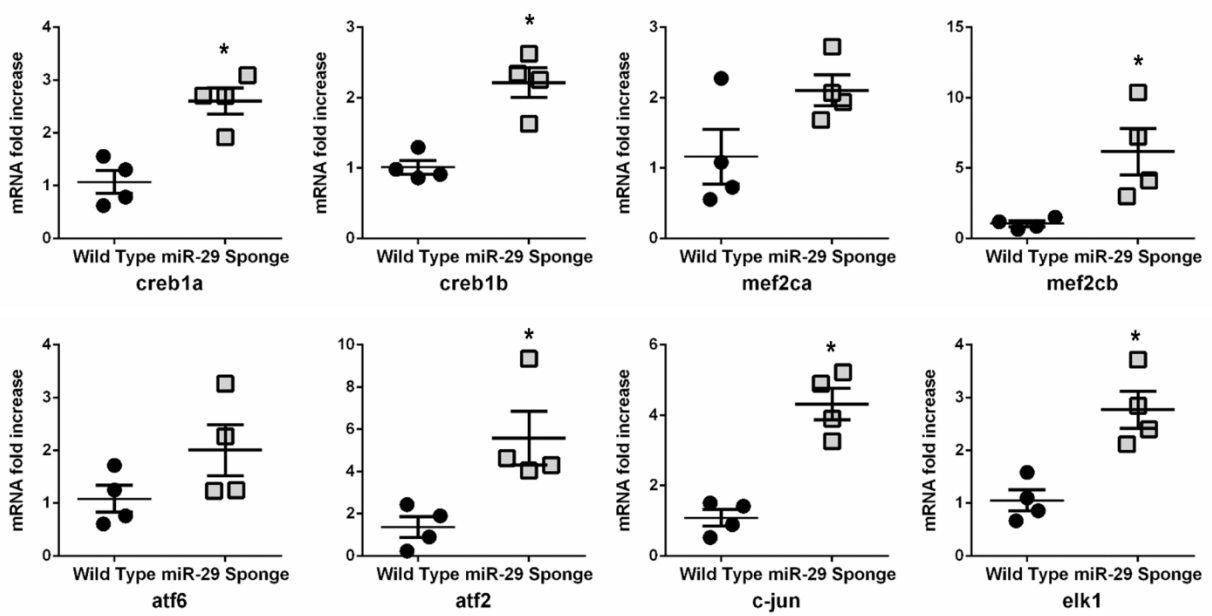

**SUPPL. FIG.3 mRNASeq and Ingenuity Pathway analysis validation**

(A) qRT-PCR analysis of a set of up and down regulated mRNAs associated with heart, methylation, fibrosis and hypoxia in Wild Type (black circles; n=4) and miR-29-sponge (gray squares; n=4) Zebrafish hearts expressed as fold-change versus Wild Type samples. (B) qRT-PCR analysis of transcription factors upstream of the predicted activation of hypertrophic response revealed by Ingenuity pathway analysis in Wild Type (black circles; n=4) and miR-29-sponge (gray squares; n=4) Zebrafish hearts expressed as fold-change versus Wild Type samples. \*p<0.05 Vs Wild Type

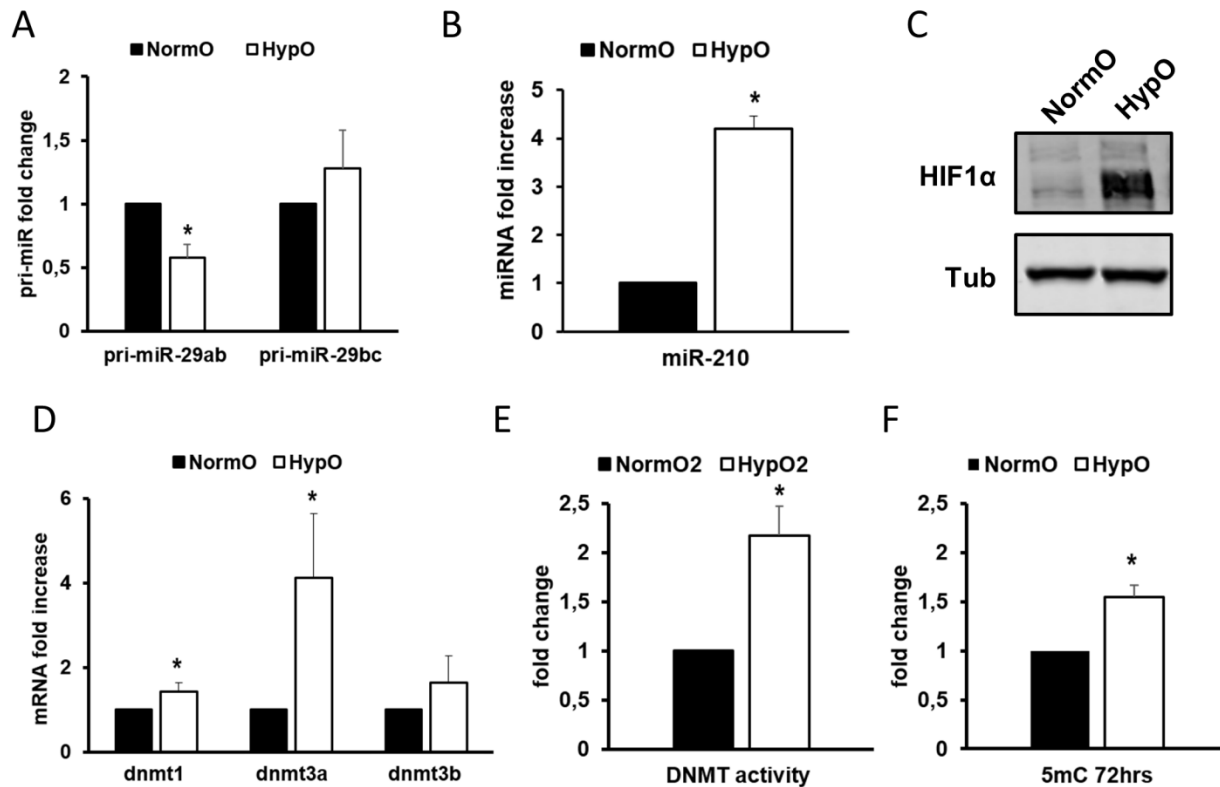

**SUPPL. FIG.4 Analysis of hypoxia in HCFs**

(A) qRT-PCR analysis of pri-miR-29 in HCFs under normoxic conditions (NormO; black bars) and 48h hypoxia (HypO; white bars), expressed as fold-change versus normoxic samples (n=11). (B) qRT-PCR analysis of miR-210 in HCF under normoxic conditions (NormO; black bars) and 48h hypoxia (HypO; white bars) expressed as fold-change versus normoxic samples (n=3; \*p<0.05 Vs normoxia). (C) Representative western blot of hypoxia inducible factor 1α (HIF1α) expression in HCF under normoxic condition and 48h hypoxia. In each condition, α-tubulin was used as loading control. (D) qRT-PCR analysis of dnmts in HCFs under normoxic conditions (NormO; black bars) and 48h hypoxia (HypO; white bars), expressed as fold-change versus normoxic samples (n=11). (E) DNMT activity quantification in HCFs under normoxic condition (black bar) and hypoxia (white bar) expressed as fold-change versus normoxic samples (n=7). (F) Global DNA methylation quantification of 5mC in HCFs cultured in normoxic (black bars) and hypoxic (white bars) conditions (n=3). \*p<0.05 Vs normoxia.

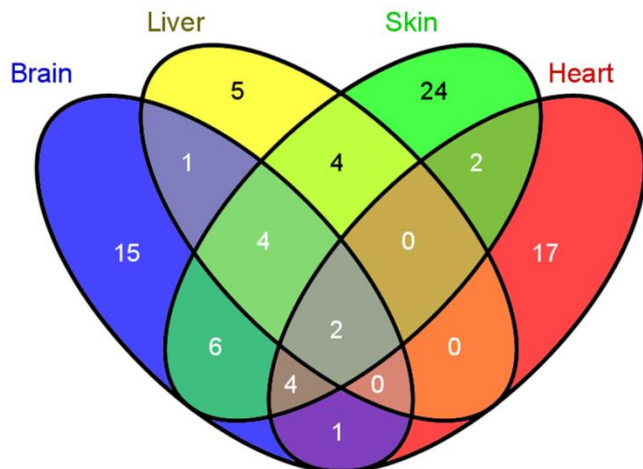

**Common in all tissues**  
**miR-29a**  
**miR-27d**

**SUPPL. FIG.5 miR-29 is up regulated in different Nfu tissues.**

Venn diagrams depicting the distribution of up-regulated miRNAs among Nfu heart, brain, skin and liver with age.

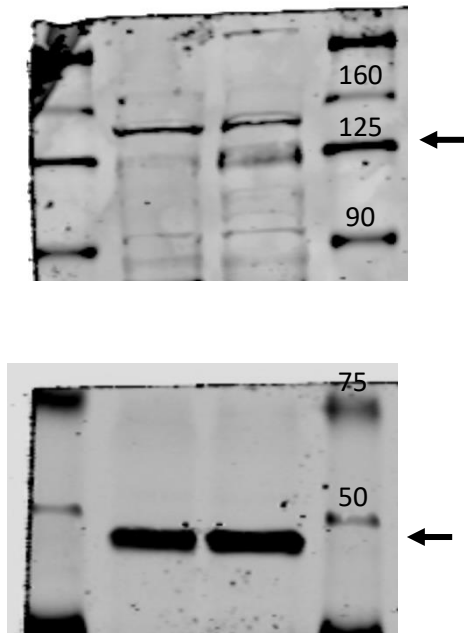

**SUPPL. FIG.6 Full-length blot from figure 7 panel E**

Representative western blot analysis of hypoxia inducible factor 1 $\alpha$  (HIF1 $\alpha$ ) expression in wild type and miR-29-sponge zebrafish heart. In each condition,  $\alpha$ -tubulin was used as loading control.

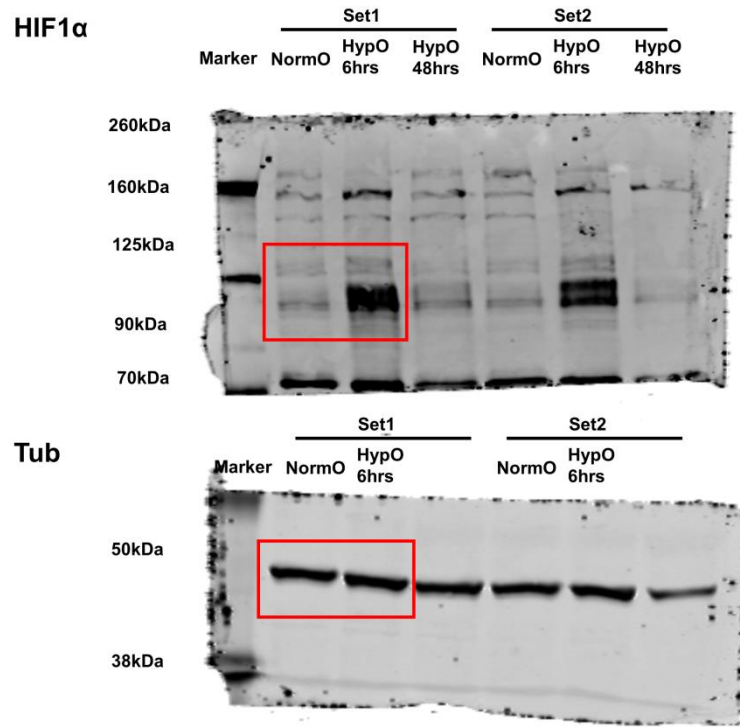

**SUPPL. FIG.7 Full-length blot from Suppl. figure 4 panel C**

Representative western blot analysis of hypoxia inducible factor 1 $\alpha$  (HIF1 $\alpha$ ) expression in HCF under normoxic condition and 48h hypoxia. In each condition,  $\alpha$ -tubulin was used as loading control.



**Supplementary table 1.** Differentially regulated miRNAs among 5wks, 12 wks and 27wks N. Furzeri depicted in figure 2 panel B.

| miR                                          | 5wks       | 12wks      | 27wks      |
|----------------------------------------------|------------|------------|------------|
| miR-1                                        | 323,1036   | 636,387264 | 692,902908 |
| miR-133a-3p                                  | 4529,79768 | 4049,0371  | 3679,30829 |
| miR-133a-5p                                  | 192,249469 | 180,319    | 180,243586 |
| miR-499-3p                                   | 3008,80428 | 3568,51655 | 3481,44867 |
| miR-499-5p                                   | 9906,21655 | 16397,0433 | 20289,1101 |
| miR-155                                      | 61,9113416 | 20,0572411 | 150,213746 |
| miR-34a                                      | 74,9388183 | 93,1772622 | 97,8936591 |
| miR-29a                                      | 317,150218 | 812,008289 | 948,126539 |
| miR-181b-3p                                  | 19,0716094 | 24,8742793 | 19,1519694 |
| miR-181b-5p                                  | 4610,38585 | 2401,74467 | 2534,68659 |
| miRs that are up-regulated (1.3 change fold) |            |            |            |
| miR-29b                                      | 96,9063022 | 168,144563 | 261,564295 |
| miR-133b-3p                                  | 146,537847 | 243,880088 | 395,561973 |
| miR-2184                                     | 918,216772 | 1877,56678 | 2468,69029 |
| miR-193a-3p                                  | 3,94398564 | 6,0453357  | 11,7623056 |
| miR-29a                                      | 317,150218 | 812,008289 | 948,126539 |
| miR-458-3p                                   | 253,11779  | 640,533336 | 790,73317  |
| miR-223                                      | 79,8547649 | 179,926058 | 297,113721 |
| miR-10b-2-3p                                 | 0,37970597 | 0,79936896 | 1,60644246 |
| miR-730                                      | 0,22800113 | 0,43743851 | 1,11222556 |
| miR-92b-3p                                   | 4,60882739 | 10,6338358 | 20,3985311 |
| miR-204-5p                                   | 1172,14552 | 845,747237 | 2703,05727 |
| miR-429b                                     | 0,43719715 | 1,10873941 | 3,57090792 |
| miR-458-5p                                   | 0          | 0,38260498 | 0,8613741  |
| miR-194a                                     | 4,9324538  | 10,3789124 | 97,0973059 |
| miR-194b                                     | 8,01321908 | 31,1489721 | 354,234331 |

|                                                |            |            |            |
|------------------------------------------------|------------|------------|------------|
| miR-459-5p                                     | 0,37662542 | 5,15523475 | 42,6554603 |
| miRs that are down-regulated (1.3 change fold) |            |            |            |
| miR-735-5p                                     | 2,61596111 | 1,46270717 | 0,14302268 |
| miR-457a                                       | 0,38572806 | 0,37223407 | 0          |
| miR-203a-3p                                    | 274,800144 | 142,54534  | 69,7154785 |
| miR-206-3p                                     | 42,478648  | 7,91299281 | 3,05123364 |
| miR-206-5p                                     | 1,62699623 | 0,14842011 | 0,07891031 |
| miR-20a-3p                                     | 70,6207249 | 85,828302  | 67,065456  |
| miR-130a                                       | 2,64351471 | 2,15503416 | 0,32965821 |
| miR-301c-3p                                    | 59,8825229 | 26,5672123 | 9,15999434 |
| miR-301c-5p                                    | 0,17182915 | 0,07073388 | 0          |
| miR-454b                                       | 142,106977 | 109,537074 | 31,5573926 |
| miR-725-3p                                     | 246,33571  | 137,954791 | 47,8485642 |
| miR-144-5p                                     | 7577,66046 | 6401,6827  | 2152,53869 |
| miR-205-5p                                     | 1756,43113 | 1208,38232 | 395,119796 |
| miR-203a-5p                                    | 10,3575767 | 6,75866996 | 2,99624985 |
| miR-16a                                        | 1687,60014 | 1126,46326 | 587,526283 |
| miR-138-3p                                     | 1,56733197 | 1,19259746 | 0,54545093 |
| miR-203b-5p                                    | 27,0078293 | 18,8271163 | 8,31013605 |
| miR-181c-5p                                    | 238,939    | 166,194692 | 95,5201903 |

**Supplementary table 2. List of up- and down-modulated miRNAs in Nfu heart.**

(A) Up-regulated miRNAs. (B) Down-regulated miRNAs.

(A)

| <b>miRNA up-regulated with age</b> |
|------------------------------------|
| miR-29a                            |
| miR-29b                            |
| miR-133b-3p                        |
| miR-193a-3p                        |
| miR-223                            |
| miR-10b-2-3p                       |
| miR-92b-3p                         |
| miR-458-3p                         |
| miR-730                            |
| miR-2184                           |

(B)

| <b>miRNA down-regulated with age</b> |
|--------------------------------------|
| miR-205                              |
| miR-181c                             |
| miR-725                              |
| miR-16                               |
| miR-138                              |
| miR-203a                             |
| miR-203b                             |

**Supplementary table 3.** Up-regulated transcripts (fdr < 0.05) between WT and miR-29 Sponge zebrafish depicted in figure 7 panel A.

| Ensembl gene id    | Chr | Start    | Stop     | Strand | Ensembl gene     |
|--------------------|-----|----------|----------|--------|------------------|
| ENSDARG00000070494 | 20  | 22535507 | 22576582 | -      | pdgfra           |
| ENSDARG00000061759 | 9   | 33978906 | 34053238 | +      | kdm6a            |
| ENSDARG00000052697 | 5   | 49114518 | 49431837 | -      | fam172a          |
| ENSDARG00000101322 | 2   | 5008604  | 5034301  | -      | tfr1a            |
| ENSDARG00000017316 | 13  | 15631286 | 15668299 | -      | bag5             |
| ENSDARG00000071052 | 23  | 13159982 | 13178794 | +      | si:dkey-150i13,2 |
| ENSDARG00000056725 | 7   | 25642032 | 25647088 | +      | hmgb3a           |
| ENSDARG00000077236 | 15  | 37657985 | 37806875 | +      | hspb6            |
| ENSDARG00000098646 | 5   | 68943906 | 68960202 | +      | mthfd2           |
| ENSDARG00000036629 | 21  | 33418568 | 33422984 | +      | rps14            |
| ENSDARG00000055290 | 8   | 29700878 | 29704389 | -      | mpeg1,1          |
| ENSDARG00000090310 | 22  | 6892160  | 6893501  | -      | CABZ01065328,1   |
| ENSDARG00000037071 | 23  | 27748995 | 27754481 | +      | rps26            |
| ENSDARG00000042725 | 8   | 28414259 | 28415774 | -      | cebpb            |
| ENSDARG00000012600 | 2   | 42099143 | 42134146 | -      | HELZ2            |
| ENSDARG00000079848 | 18  | 34205451 | 34239033 | +      | gmps             |
| ENSDARG00000091679 | 3   | 7344101  | 7360793  | -      | CU672268,1       |
| ENSDARG00000004954 | 3   | 29783585 | 29810515 | -      | grna             |
| ENSDARG00000079839 | 21  | 14599906 | 14666411 | -      | arrdc1b          |
| ENSDARG00000042533 | 8   | 25276021 | 25282662 | +      | gstm             |
| ENSDARG00000093182 | 12  | 17469912 | 17481084 | -      | eif2ak1          |
| ENSDARG00000070839 | 6   | 29019766 | 29095912 | -      | evi5b            |
| ENSDARG00000030602 | 16  | 24274933 | 24280294 | -      | rps19            |
| ENSDARG00000103428 | 10  | 45301555 | 45359281 | +      | ogdhh            |

Heid, Cencioni, Ripa, Baumgart et al. miR-29 protects aging heart\_Supplemental data

|                    |    |          |          |   |                   |
|--------------------|----|----------|----------|---|-------------------|
| ENSDARG00000002405 | 5  | 20282967 | 20310868 | - | si:ch211-225b11,1 |
| ENSDARG00000013128 | 9  | 3129042  | 3143876  | - | pdk1              |
| ENSDARG00000045636 | 25 | 35506531 | 35539644 | - | rbl2              |
| ENSDARG00000038476 | 2  | 57777903 | 57785674 | - | si:dkeyp-68b7,7   |
| ENSDARG00000099657 | 17 | 1754809  | 1787403  | + | AKT1              |
| ENSDARG00000068710 | 13 | 49753659 | 49826548 | - | nid1a             |
| ENSDARG00000011855 | 8  | 48976998 | 49055643 | + | aak1a             |
| ENSDARG00000097414 | 25 | 28419458 | 28449680 | + | si:ch211-106e7,2  |
| ENSDARG00000006368 | 22 | 21127861 | 21144144 | + | crlf1b            |
| ENSDARG00000091260 | 2  | 381299   | 414238   | + | mylk4a            |
| ENSDARG00000015053 | 4  | 13034769 | 13256964 | - | grip1             |
| ENSDARG00000062148 | 9  | 30407082 | 30437215 | - | SENP7             |
| ENSDARG00000053624 | 21 | 43846478 | 43885949 | + | csf1rb            |
| ENSDARG00000007708 | 21 | 3638418  | 3645040  | - | nsa2              |
| ENSDARG00000068199 | 18 | 46265151 | 46282560 | - | pld3              |
| ENSDARG00000040640 | 22 | 7729316  | 7748986  | - | si:ch73-44m9,3    |
| ENSDARG00000002956 | 12 | 4077636  | 4108676  | + | si:dkey-32n7,4    |
| ENSDARG00000037154 | 16 | 34367364 | 34387992 | - | hivep3b           |
| ENSDARG00000043509 | 19 | 44185328 | 44191343 | + | rpl11             |
| ENSDARG00000007693 | 17 | 12788568 | 12792670 | + | nfkbiab           |
| ENSDARG00000095783 | 6  | 49762576 | 49770447 | - | si:dkey-249d8,1   |
| ENSDARG00000013110 | 10 | 20150231 | 20246676 | + | dmtn              |
| ENSDARG00000033170 | 12 | 624354   | 640031   | - | sult2st1          |
| ENSDARG00000028228 | 13 | 11303655 | 11312559 | + | zbtb18            |
| ENSDARG00000015536 | 7  | 26980282 | 27181168 | + | sox6              |
| ENSDARG00000017034 | 25 | 32062320 | 32084406 | + | sqrld             |
| ENSDARG00000098257 | 13 | 41044796 | 41420889 | - | pcdh15a           |
| ENSDARG00000095825 | 23 | 46042411 | 46053109 | - | si:ch73-67c22,3   |
| ENSDARG00000006003 | 13 | 35778503 | 35782443 | - | mycla             |

|                    |    |          |          |   |                   |
|--------------------|----|----------|----------|---|-------------------|
| ENSDARG00000104760 | 16 | 35641749 | 35692535 | + | MAP3K6            |
| ENSDARG00000092310 | 19 | 43984189 | 44008335 | + | si:ch211-199g17,2 |
| ENSDARG00000006900 | 8  | 26040453 | 26060002 | + | impdh2            |
| ENSDARG00000062134 | 23 | 21140838 | 21188181 | + | kcnab2b           |
| ENSDARG00000042630 | 20 | 30991214 | 30998155 | - | hebp2             |
| ENSDARG00000025766 | 23 | 27114570 | 27134531 | - | DTX3              |
| ENSDARG00000101362 | 22 | 4733941  | 4738182  | + | mibp              |
| ENSDARG00000042018 | 9  | 6600595  | 6624003  | + | fhl2a             |
| ENSDARG00000077499 | 16 | 38065318 | 38117920 | - | plekho1b          |
| ENSDARG00000025850 | 23 | 9285466  | 9293608  | + | rps21             |
| ENSDARG00000037421 | 14 | 21035277 | 21039140 | - | egr1              |
| ENSDARG00000086762 | 19 | 20453534 | 20470242 | + | dfna5a            |
| ENSDARG00000031954 | 22 | 10115371 | 10135764 | - | rbck1             |
| ENSDARG00000016156 | 12 | 46867600 | 46921771 | + | fam53b            |
| ENSDARG00000059857 | 2  | 50110400 | 50126493 | - | blvra             |
| ENSDARG00000071697 | 14 | 20621456 | 20703366 | + | zgc:66433         |
| ENSDARG00000075977 | 25 | 20977374 | 20994568 | - | prp5              |
| ENSDARG00000036840 | 11 | 11532157 | 11534848 | - | krt15             |
| ENSDARG00000022165 | 4  | 12720116 | 12726664 | - | mgst1,2           |
| ENSDARG00000101361 | 2  | 22850713 | 22875318 | - | znf644a           |
| ENSDARG00000104311 | 16 | 35603026 | 35634437 | - | scmh1             |
| ENSDARG00000071413 | 22 | 21491753 | 21520262 | + | mier2             |
| ENSDARG00000061140 | 2  | 31399372 | 31451940 | + | colec12           |
| ENSDARG00000005540 | 10 | 20112739 | 20171071 | + | xpo7              |
| ENSDARG00000060120 | 6  | 43022205 | 43031360 | - | glyctk            |
| ENSDARG00000006526 | 1  | 4806323  | 4845260  | - | fn1b              |
| ENSDARG00000040930 | 16 | 14697920 | 14785787 | + | deptor            |
| ENSDARG00000003991 | 6  | 14948853 | 14974537 | - | fhl2b             |
| ENSDARG00000020979 | 6  | 51676228 | 51763504 | + | fam65c            |

Heid, Cencioni, Ripa, Baumgart et al. miR-29 protects aging heart\_Supplemental data

|                    |    |          |          |   |                    |
|--------------------|----|----------|----------|---|--------------------|
| ENSDARG00000058731 | 8  | 12816821 | 12829697 | - | slc2a6             |
| ENSDARG00000057949 | 14 | 16819951 | 16856628 | + | slc43a3b           |
| ENSDARG00000105308 | 16 | 34446776 | 34471531 | - | si:ch211-12b16,1   |
| ENSDARG00000078676 | 25 | 3772248  | 3853924  | - | myrf               |
| ENSDARG00000036893 | 7  | 8024805  | 8098285  | - | f13a1b             |
| ENSDARG00000019280 | 21 | 41005607 | 41047237 | - | larsb              |
| ENSDARG00000100293 | 5  | 53464326 | 53514388 | - | arhgef15           |
| ENSDARG00000075054 | 10 | 3081322  | 3142059  | - | RASGRF2            |
| ENSDARG00000094451 | 8  | 23651015 | 23681186 | - | cfp                |
| ENSDARG00000003655 | 22 | 21103135 | 21125867 | - | tmem59l            |
| ENSDARG00000069388 | 7  | 21521169 | 21540116 | + | tmem88b            |
| ENSDARG00000029473 | 8  | 25279930 | 25282663 | + | zgc:173994         |
| ENSDARG00000020811 | 21 | 25551831 | 25568004 | - | efemp2b            |
| ENSDARG00000060196 | 12 | 46934399 | 46943805 | - | lhpp               |
| ENSDARG00000020761 | 11 | 13466845 | 13476123 | + | arrdc2             |
| ENSDARG00000044183 | 10 | 17979007 | 17988729 | + | prkab1a            |
| ENSDARG00000044191 | 6  | 44166191 | 44196204 | + | gxylt2             |
| ENSDARG00000030340 | 2  | 3186685  | 3203882  | - | guk1a              |
| ENSDARG00000102202 | 6  | 3550045  | 3552274  | + | phospho2           |
| ENSDARG00000098295 | 16 | 23172294 | 23274851 | + | efna3b             |
| ENSDARG00000074782 | 7  | 64707696 | 64729489 | + | ADGRG5             |
| ENSDARG00000041982 | 10 | 11635566 | 11806389 | - | adamts6            |
| ENSDARG00000030630 | 13 | 35766544 | 35828850 | + | mfsd2aa            |
| ENSDARG00000011376 | 22 | 5652789  | 5670636  | + | zgc:77816          |
| ENSDARG00000016676 | 18 | 22804399 | 22987598 | + | gnao1a             |
| ENSDARG00000091650 | 15 | 37534845 | 37552568 | + | igflr1             |
| ENSDARG00000059001 | 8  | 8889285  | 8895484  | + | pim2               |
| ENSDARG00000071361 | 22 | 17430145 | 17434609 | - | si:ch211-197g15,10 |
| ENSDARG00000036966 | 3  | 32612232 | 32646536 | + | hsd3b7             |

Heid, Cencioni, Ripa, Baumgart et al. miR-29 protects aging heart\_Supplemental data

|                    |    |          |          |   |                   |
|--------------------|----|----------|----------|---|-------------------|
| ENSDARG00000053800 | 15 | 41736239 | 41751261 | - | si:ch211-276c2,4  |
| ENSDARG00000103370 | 2  | 22839623 | 22846600 | + | lrrc8da           |
| ENSDARG00000102693 | 7  | 21519257 | 21572102 | - | si:dkey-85k7,8    |
| ENSDARG00000068759 | 5  | 13977065 | 14000405 | - | CDCA2             |
| ENSDARG00000010008 | 24 | 32261512 | 32278038 | + | vim               |
| ENSDARG00000059646 | 8  | 23617885 | 23635491 | + | nt5dc2            |
| ENSDARG00000071879 | 14 | 8464038  | 8488967  | - | tgfb2l            |
| ENSDARG00000079933 | 10 | 26540621 | 26551029 | - | SLC46A3           |
| ENSDARG00000092281 | 23 | 19679948 | 19726572 | + | FLNB              |
| ENSDARG00000068820 | 5  | 13147071 | 13152470 | + | h2afva            |
| ENSDARG00000090830 | 5  | 59845417 | 60013852 | + | tmem132e          |
| ENSDARG00000096508 | 20 | 12205588 | 12209943 | + | si:ch211-265g21,1 |
| ENSDARG00000095298 | 15 | 41789324 | 41791968 | - | ftr73             |
| ENSDARG00000095962 | 23 | 45189342 | 45204744 | - | fhdc5             |
| ENSDARG00000076858 | 10 | 20299073 | 20299794 | + | C8orf4            |
| ENSDARG00000092945 | 19 | 37922518 | 37932627 | + | si:ch211-250g4,3  |
| ENSDARG00000021539 | 11 | 27970967 | 28177012 | + | ephb2b            |
| ENSDARG00000096331 | 3  | 32468105 | 32471477 | - | si:ch73-248e21,7  |
| ENSDARG00000023058 | 17 | 6635771  | 6653555  | + | foxo3a            |
| ENSDARG00000009336 | 5  | 33949212 | 33975349 | + | aif1l             |
| ENSDARG00000071013 | 6  | 13114313 | 13142615 | - | arl6ip6           |
| ENSDARG00000027491 | 12 | 48750693 | 48759117 | - | uros              |
| ENSDARG00000092067 | 16 | 31890786 | 31913397 | + | atn1              |
| ENSDARG00000015149 | 8  | 25610583 | 25624793 | + | wasa              |
| ENSDARG00000079564 | 2  | 24600869 | 24614260 | - | vmhc              |
| ENSDARG00000059049 | 19 | 5772681  | 5781451  | - | CLEC4A            |
| ENSDARG00000088116 | 8  | 25283033 | 25287875 | + | gstm3             |
| ENSDARG00000014179 | 23 | 27627245 | 27645126 | - | pfkma             |
| ENSDARG00000038587 | 2  | 45306857 | 45309466 | + | CU929150,1        |



Heid, Cencioni, Ripa, Baumgart et al. miR-29 protects aging heart\_Supplemental data

|                    |            |          |          |   |                  |
|--------------------|------------|----------|----------|---|------------------|
| ENSDARG00000086947 | 25         | 13087219 | 13092173 | - | si:ch211-147m6,1 |
| ENSDARG00000044167 | 6          | 47845001 | 47867099 | + | padi2            |
| ENSDARG00000086724 | 6          | 47485066 | 47507826 | - | im:7151449       |
| ENSDARG00000059093 | 5          | 68156722 | 68270435 | - | ANK1             |
| ENSDARG00000077326 | 16         | 30950355 | 30974606 | - | slc45a4          |
| ENSDARG00000035415 | 5          | 34798592 | 34801415 | + | ptger4b          |
| ENSDARG00000044212 | 19         | 37955768 | 37979726 | + | CR735126,1       |
| ENSDARG00000090396 | 7          | 5183672  | 5195280  | - | CABZ01074946,1   |
| ENSDARG00000088444 | 20         | 4078267  | 4089231  | + | sell             |
| ENSDARG00000062687 | 6          | 10214377 | 10341428 | + | KCNH7            |
| ENSDARG00000040536 | 15         | 41754331 | 41756933 | - | si:ch211-276c2,5 |
| ENSDARG00000023713 | 2          | 2895633  | 2907365  | + | aqp1a,1          |
| ENSDARG00000088967 | 3          | 22312765 | 22416759 | + | WNK4             |
| ENSDARG00000105154 | KN150699,1 | 15689    | 19506    | + | creg1            |
| ENSDARG00000058839 | 5          | 8741820  | 8773690  | + | SUSD1            |
| ENSDARG00000042835 | 15         | 4430650  | 4537240  | - | tfdp2            |
| ENSDARG00000020114 | 8          | 31047865 | 31065783 | - | slc20a1a         |
| ENSDARG00000037373 | 23         | 21876859 | 22020056 | - | ephb2a           |
| ENSDARG00000086775 | 23         | 2810969  | 2842325  | + | top1             |
| ENSDARG00000091368 | 16         | 34346314 | 34352311 | - | si:dkey-18h14,2  |
| ENSDARG00000073743 | 8          | 50202096 | 50229269 | + | slc25a37         |
| ENSDARG00000104047 | 11         | 14222939 | 14234303 | + | si:ch211-262i1,3 |
| ENSDARG00000042090 | 5          | 1646191  | 1681536  | + | PLA2G4C          |
| ENSDARG00000100677 | 3          | 14349275 | 14358961 | + | tmem205          |
| ENSDARG00000076657 | 23         | 7653868  | 7740872  | - | plagl2           |
| ENSDARG00000055991 | 15         | 23576105 | 23594680 | - | hmbsb            |
| ENSDARG00000001889 | 23         | 35609927 | 35612595 | + | tuba1a           |
| ENSDARG00000095167 | 10         | 20186416 | 20193947 | - | si:dkeyp-66d7,4  |
| ENSDARG00000062854 | 1          | 10436884 | 10833134 | - | sdk1b            |

Heid, Cencioni, Ripa, Baumgart et al. miR-29 protects aging heart\_Supplemental data

|                    |            |          |          |   |                   |
|--------------------|------------|----------|----------|---|-------------------|
| ENSDARG00000095509 | 5          | 20039192 | 20042151 | + | si:dkeyp-91h9,1   |
| ENSDARG00000096539 | 20         | 22294520 | 22297494 | + | si:ch211-278f21,4 |
| ENSDARG00000014866 | 25         | 36502300 | 36513143 | - | hprt1l            |
| ENSDARG00000007349 | 5          | 44344664 | 44391191 | + | dmrt1             |
| ENSDARG00000013539 | 13         | 15826890 | 15863480 | - | ikzf1             |
| ENSDARG00000093851 | 8          | 12413746 | 12631408 | - | si:ch73-332k15,1  |
| ENSDARG00000092652 | 21         | 16048284 | 16070514 | + | qrfpr4            |
| ENSDARG00000020771 | 2          | 35258307 | 35491658 | + | tnr               |
| ENSDARG00000029019 | 16         | 26576173 | 26614727 | + | epb41b            |
| ENSDARG00000003027 | 16         | 29750934 | 29755589 | - | scnm1             |
| ENSDARG00000018146 | 11         | 35786596 | 35894988 | - | gpx1a             |
| ENSDARG00000069282 | 15         | 23809952 | 23826315 | - | bbc3              |
| ENSDARG00000019930 | 22         | 16509305 | 16519060 | + | tal1              |
| ENSDARG00000010425 | 20         | 1333869  | 1363090  | - | scara5            |
| ENSDARG00000075557 | 6          | 49652223 | 49674823 | - | apcdd1l           |
| ENSDARG00000039373 | 9          | 16437405 | 16619849 | + | epha3             |
| ENSDARG00000019525 | 5          | 62554860 | 62592686 | - | tbcelb            |
| ENSDARG00000086579 | 1          | 50998008 | 51016982 | + | APLF              |
| ENSDARG00000041257 | 14         | 16802350 | 16816060 | - | smtnl1            |
| ENSDARG00000061747 | 9          | 34054338 | 34068291 | - | C9HXorf36         |
| ENSDARG00000034588 | 3          | 22142529 | 22186270 | + | scn4ab            |
| ENSDARG00000004392 | 5          | 26804793 | 26814928 | + | hdr               |
| ENSDARG00000044326 | 6          | 36486571 | 36492212 | + | BX950188,1        |
| ENSDARG00000034852 | 10         | 17502924 | 17561599 | - | nt5c2l1           |
| ENSDARG00000095412 | 8          | 25320378 | 25322349 | + | si:dkey-183p4,9   |
| ENSDARG00000098508 | KN150067,1 | 4416     | 13245    | - | SEMA7A            |
| ENSDARG00000045999 | 7          | 12688763 | 12703714 | + | saa               |
| ENSDARG00000095019 | 18         | 38307869 | 38315657 | + | lmo2              |
| ENSDARG00000053646 | 8          | 37667755 | 37706317 | + | adrb3a            |

Heid, Cencioni, Ripa, Baumgart et al. miR-29 protects aging heart\_Supplemental data

|                    |    |          |          |   |                   |
|--------------------|----|----------|----------|---|-------------------|
| ENSDARG00000101146 | 11 | 44774774 | 44784684 | - | CR293511,2        |
| ENSDARG00000078781 | 6  | 53373119 | 53391348 | - | si:ch211-161c3,6  |
| ENSDARG00000074441 | 8  | 4519426  | 4529990  | - | gp1bb             |
| ENSDARG00000095304 | 5  | 41671657 | 41672397 | - | si:ch211-207c6,2  |
| ENSDARG00000040485 | 16 | 21619295 | 21635407 | + | dfna5b            |
| ENSDARG00000076950 | 16 | 17352455 | 17392053 | - | kel               |
| ENSDARG00000096917 | 22 | 13251916 | 13325579 | - | si:ch211-227m13,1 |
| ENSDARG00000101879 | 6  | 39536017 | 39540467 | + | CU467856,1        |
| ENSDARG00000091723 | 17 | 45619388 | 45638271 | + | si:ch211-202f3,4  |
| ENSDARG00000043126 | 22 | 9887325  | 9894010  | + | blf               |
| ENSDARG00000097160 | 9  | 7262505  | 7279486  | - | si:ch211-121j5,4  |
| ENSDARG00000042925 | 22 | 15225144 | 15254255 | - | mfng              |
| ENSDARG00000070214 | 11 | 37681634 | 37730214 | - | slc41a1           |
| ENSDARG00000086708 | 8  | 25323757 | 25332556 | + | TRAF3IP3          |
| ENSDARG00000090834 | 3  | 14394007 | 14414315 | + | epor              |
| ENSDARG00000074231 | 3  | 13114701 | 13197182 | + | SLC9A3R2          |
| ENSDARG00000062707 | 8  | 2202369  | 2247934  | - | plat              |
| ENSDARG00000070894 | 23 | 19728958 | 19741415 | + | abhd6b            |
| ENSDARG00000074581 | 5  | 13281751 | 13335244 | - | add2              |
| ENSDARG00000005704 | 8  | 25288864 | 25310828 | - | eps8l3            |
| ENSDARG00000013477 | 11 | 25174298 | 25181240 | - | gata1a            |
| ENSDARG00000077121 | 7  | 25052585 | 25077440 | + | cyp26b1           |
| ENSDARG00000078839 | 10 | 18505004 | 18506503 | - | LRRTM4            |
| ENSDARG00000017429 | 18 | 46397891 | 46466483 | - | sphkap            |
| ENSDARG00000063370 | 23 | 4385724  | 4409136  | + | sgk2a             |
| ENSDARG00000058818 | 23 | 6652495  | 6698134  | + | rbm38             |
| ENSDARG00000096829 | 18 | 46153487 | 46162090 | + | blvrb             |
| ENSDARG00000030262 | 23 | 9973771  | 9990598  | - | si:ch211-220i18,4 |
| ENSDARG00000018461 | 24 | 7712202  | 7717159  | + | FTL               |

|                    |    |          |          |   |                 |
|--------------------|----|----------|----------|---|-----------------|
| ENSDARG00000059682 | 1  | 43440003 | 43460114 | - | slc43a3a        |
| ENSDARG00000079947 | 21 | 17243516 | 17259903 | - | gfi1b           |
| ENSDARG00000075830 | 3  | 30384523 | 30494377 | - | syt3            |
| ENSDARG00000012137 | 20 | 5063655  | 5094363  | + | cyp46a1,1       |
| ENSDARG00000103555 | 3  | 12696674 | 12698948 | + | si:ch211-8c17,4 |
| ENSDARG00000061848 | 2  | 24281303 | 24357609 | - | col15a1b        |
| ENSDARG00000088505 | 23 | 12217089 | 12223715 | - | fam217b         |
| ENSDARG00000060862 | 16 | 25640277 | 25653480 | - | atxn1b          |
| ENSDARG00000054447 | 11 | 43142747 | 43165191 | + | SLC29A1         |
| ENSDARG00000044550 | 21 | 27290747 | 27303205 | - | hif1a12         |
| ENSDARG00000062530 | 19 | 19825871 | 19834636 | + | ASTE1           |
| ENSDARG00000073781 | 21 | 25508277 | 25519545 | - | si:dkey-17e16,9 |
| ENSDARG00000090638 | 23 | 4753753  | 4756677  | + | gp9             |
| ENSDARG00000056765 | 8  | 21334686 | 21340400 | - | ela2l           |
| ENSDARG00000011672 | 8  | 26564692 | 26623305 | - | sema3b          |
| ENSDARG00000002194 | 13 | 45357468 | 45387357 | - | rhd             |
| ENSDARG00000091101 | 17 | 53310101 | 53311981 | + | fabp10b         |
| ENSDARG00000097339 | 17 | 53309479 | 53309937 | + | slc9a1          |
| ENSDARG00000004647 | 24 | 21185626 | 21199022 | - | spice1          |
| ENSDARG00000103576 | 22 | 35985725 | 36013476 | + | EPHB3           |
| ENSDARG00000020984 | 20 | 133488   | 158943   | - | slc16a10        |
| ENSDARG00000101814 | 22 | 24617696 | 24639563 | + | lpar3           |
| ENSDARG00000099600 | 11 | 44760126 | 44771398 | - | si:dkey-93h22,7 |
| ENSDARG00000010764 | 15 | 43285404 | 43315792 | + | flj13639        |
| ENSDARG00000036558 | 9  | 42019826 | 42177718 | + | col18a1         |
| ENSDARG00000053026 | 12 | 38541303 | 38630908 | + | kif19           |
| ENSDARG00000009626 | 24 | 33311911 | 33361719 | - | nrbp2b          |
| ENSDARG00000096355 | 3  | 33833739 | 33965713 | - | ighv1-4         |
| ENSDARG00000055642 | 12 | 14040794 | 14092413 | + | GPT             |

Heid, Cencioni, Ripa, Baumgart et al. miR-29 protects aging heart\_Supplemental data

|                    |    |          |          |   |                   |
|--------------------|----|----------|----------|---|-------------------|
| ENSDARG00000079252 | 12 | 9811633  | 9838233  | + | fam117ab          |
| ENSDARG00000036587 | 1  | 46474610 | 46482000 | + | cbr1              |
| ENSDARG00000097679 | 15 | 41780517 | 41787133 | - | si:dkey-101o7,6   |
| ENSDARG00000095587 | 5  | 41652056 | 41653160 | - | si:ch211-207c6,15 |
| ENSDARG00000042041 | 5  | 8843646  | 8845563  | + | tal2              |
| ENSDARG00000102157 | 4  | 1089710  | 1134207  | - | si:ch211-117i20,2 |
| ENSDARG00000069031 | 21 | 40993682 | 41002293 | - | plac8l1           |
| ENSDARG00000098612 | 4  | 1132898  | 1271224  | + | chrn2a            |
| ENSDARG00000022518 | 6  | 29486372 | 29621708 | - | pex5a             |
| ENSDARG00000071876 | 14 | 9150661  | 9169831  | + | rell2             |
| ENSDARG00000031119 | 3  | 61168723 | 61258261 | - | baiap2l1b         |
| ENSDARG00000054914 | 16 | 30990524 | 31042800 | - | dgat1b            |
| ENSDARG00000094215 | 4  | 75411477 | 75428073 | - | si:dkey-240n22,2  |
| ENSDARG00000060569 | 17 | 37677119 | 37702243 | + | tmem229b          |
| ENSDARG00000057206 | 12 | 15624642 | 15633978 | + | nmt1b             |
| ENSDARG00000011257 | 16 | 9718819  | 9771303  | + | enpp2             |
| ENSDARG00000061918 | 14 | 25242349 | 25279919 | - | cplx2             |
| ENSDARG00000009131 | 20 | 23532385 | 23541855 | - | slc10a4           |
| ENSDARG00000098045 | 5  | 49103746 | 49122419 | + | si:dkey-172f14,2  |
| ENSDARG00000096849 | 3  | 32193429 | 32205981 | - | si:dkey-16p21,8   |
| ENSDARG00000076142 | 19 | 33616996 | 33624863 | - | trib1             |
| ENSDARG00000086703 | 23 | 31993314 | 32005545 | - | si:dkey-126g1,7   |
| ENSDARG00000076093 | 15 | 41758263 | 41798441 | - | ftr76             |
| ENSDARG00000058725 | 21 | 11737208 | 11741824 | - | rfesd             |
| ENSDARG00000045144 | 12 | 20214196 | 20215400 | + | HBZ               |
| ENSDARG00000087706 | 16 | 22004166 | 22006416 | - | dicp3,3           |
| ENSDARG00000090757 | 7  | 8124164  | 8124803  | + | CR382283,1        |
| ENSDARG00000056797 | 1  | 13592828 | 13620325 | + | ppp2r2ca          |
| ENSDARG00000077736 | 14 | 50866586 | 50892594 | - | CPLX1             |

|                     |    |          |          |   |                   |
|---------------------|----|----------|----------|---|-------------------|
| ENSDARG00000004158  | 17 | 44666401 | 44809896 | + | tmem63c           |
| ENSDARG000000077881 | 23 | 11412343 | 11513888 | + | chl1a             |
| ENSDARG000000045316 | 24 | 23975598 | 24018027 | - | map7d2b           |
| ENSDARG000000100898 | 4  | 1178079  | 1178196  | + | 5S_rRNA           |
| ENSDARG000000077367 | 8  | 11953547 | 12074952 | + | ntng2a            |
| ENSDARG000000063475 | 15 | 5037461  | 5083836  | + | abcg1             |
| ENSDARG000000055373 | 11 | 35186568 | 35313808 | - | sema3fb           |
| ENSDARG000000038643 | 8  | 21321758 | 21338179 | + | alas2             |
| ENSDARG000000023952 | 20 | 18840935 | 18857670 | + | fam167ab          |
| ENSDARG000000087745 | 11 | 28229124 | 28267804 | + | LRRC38            |
| ENSDARG000000099351 | 20 | 6818827  | 6822741  | - | igfbp1a           |
| ENSDARG000000103978 | 16 | 36118244 | 36154631 | + | sh3bp5b           |
| ENSDARG000000068096 | 5  | 29814097 | 29818483 | - | atf5a             |
| ENSDARG000000019253 | 20 | 14118833 | 14158103 | - | rhag              |
| ENSDARG000000017400 | 6  | 7894004  | 7905419  | + | klf1              |
| ENSDARG000000070579 | 1  | 2299202  | 2305391  | - | ggact,3           |
| ENSDARG000000007220 | 15 | 18431302 | 18638742 | - | ncam1b            |
| ENSDARG000000068082 | 6  | 60025410 | 60027562 | - | wbp4              |
| ENSDARG000000028850 | 15 | 18262856 | 18273701 | - | btr16             |
| ENSDARG000000069593 | 9  | 30399649 | 30402925 | + | senp7a            |
| ENSDARG000000078429 | 22 | 24703538 | 24830407 | - | vtg4              |
| ENSDARG000000097651 | 6  | 60039386 | 60046179 | + | tgm8              |
| ENSDARG000000096667 | 1  | 25974158 | 25976405 | + | si:dkey-25o16,2   |
| ENSDARG000000020890 | 16 | 29716075 | 29749570 | + | tmod4             |
| ENSDARG000000077840 | 20 | 10111869 | 10133202 | - | meis2b            |
| ENSDARG000000104027 | 3  | 44061195 | 44070142 | + | si:ch211-207b24,4 |
| ENSDARG000000098113 | 15 | 29962216 | 29984669 | - | WSCD1             |
| ENSDARG000000011166 | 2  | 29493850 | 29501875 | - | cahz              |
| ENSDARG000000052376 | 1  | 52836283 | 52844567 | - | b3gnt2a           |

Heid, Cencioni, Ripa, Baumgart et al. miR-29 protects aging heart\_Supplemental data

|                     |    |          |          |   |                    |
|---------------------|----|----------|----------|---|--------------------|
| ENSDARG00000043089  | 15 | 1002489  | 1015550  | + | alox5b,2           |
| ENSDARG00000033355  | 5  | 1612139  | 1636508  | + | PLA2G4C            |
| ENSDARG00000070857  | 23 | 20142356 | 20174093 | - | si:dkey-32e6,6     |
| ENSDARG00000035056  | 14 | 31843664 | 32063455 | - | fgf13a             |
| ENSDARG00000015072  | 5  | 44407809 | 44410963 | + | dmrt2a             |
| ENSDARG00000077504  | 8  | 29709460 | 29710161 | - | si:ch211-103n10,5  |
| ENSDARG00000053066  | 6  | 49883211 | 49889765 | + | tubb1              |
| ENSDARG00000052016  | 1  | 43425989 | 43440139 | + | cabp2a             |
| ENSDARG00000040741  | 2  | 44552954 | 44657754 | + | kcnab1b            |
| ENSDARG00000084957  | 21 | 27298430 | 27298566 | + | 5S_rRNA            |
| ENSDARG00000063436  | 10 | 3481035  | 3514892  | + | RPH3A              |
| ENSDARG00000012881  | 3  | 19916121 | 19944785 | - | slc4a1a            |
| ENSDARG00000075713  | 15 | 2218531  | 2224850  | - | shox2              |
| ENSDARG00000052375  | 1  | 52817984 | 52833422 | - | zgc:66455          |
| ENSDARG00000037478  | 7  | 42794171 | 42972949 | - | cdh8               |
| ENSDARG00000070317  | 16 | 25907423 | 25914747 | - | irge4              |
| ENSDARG00000093971  | 23 | 11409649 | 11410803 | - | si:dkey-177g18,1   |
| ENSDARG00000016825  | 22 | 24783772 | 24790442 | - | vtg6               |
| ENSDARG000000103883 | 22 | 1106212  | 1110896  | + | si:ch1073-181h11,2 |
| ENSDARG00000007739  | 1  | 1564308  | 1667865  | + | atp1a1a,2          |
| ENSDARG00000079637  | 21 | 10773793 | 10787937 | + | alpk2              |
| ENSDARG00000088641  | 19 | 40609342 | 40611978 | - | grn2               |
| ENSDARG00000092126  | 22 | 24723477 | 24830407 | - | vtg5               |
| ENSDARG00000055809  | 22 | 24842066 | 24853200 | - | vtg2               |
| ENSDARG00000059747  | 3  | 38651641 | 38717447 | + | si:dkey-106c17,3   |
| ENSDARG00000061585  | 14 | 29635046 | 29751221 | + | cyp4v7             |
| ENSDARG00000097522  | 6  | 18067656 | 18068466 | + | si:ch211-89i1,3    |
| ENSDARG000000105160 | 13 | 18106014 | 18109699 | + | BX927098,1         |
| ENSDARG00000028548  | 17 | 7367211  | 7374391  | + | klhl10b,2          |

Heid, Cencioni, Ripa, Baumgart et al. miR-29 protects aging heart\_Supplemental data

|                    |    |          |          |   |                  |
|--------------------|----|----------|----------|---|------------------|
| ENSDARG00000092949 | 2  | 15121704 | 15129715 | - | si:ch73-366i20,1 |
| ENSDARG00000061014 | 18 | 48613669 | 48645587 | + | kcnj5            |
| ENSDARG00000038248 | 1  | 2302346  | 2305380  | - | ggact,2          |
| ENSDARG00000092233 | 22 | 24703341 | 24710564 | - | vtg1             |
| ENSDARG00000092419 | 22 | 24703538 | 24830426 | - | vtg7             |
| ENSDARG00000015854 | 13 | 29278909 | 29290881 | - | chata            |



**Supplementary table 4.** Down-regulated transcripts ( $\text{fdr} < 0.05$ ) between WT and miR-29 Sponge zebrafish depicted in figure 7 panel A.

| Ensembl gene id    | Chr | Start    | Stop     | Strand | Ensembl gene      |
|--------------------|-----|----------|----------|--------|-------------------|
| ENSDARG00000090870 | 21  | 43635262 | 43641455 | -      | si:ch1073-263o8,2 |
| ENSDARG00000093487 | 3   | 4037556  | 4045078  | -      | si:dkey-217f16,2  |
| ENSDARG00000080001 | 22  | 27489648 | 27499674 | -      | si:dkey-208m12,2  |
| ENSDARG00000099482 | 13  | 15719189 | 15723933 | +      | BX569782,1        |
| ENSDARG00000014480 | 21  | 8106127  | 8169341  | +      | nr6a1b            |
| ENSDARG00000092924 | 24  | 9871275  | 9874126  | -      | zgc:171474        |
| ENSDARG00000037473 | 16  | 26259509 | 26267326 | -      | cd79a             |
| ENSDARG00000099364 | 22  | 7492685  | 7505123  | -      | BX511034,4        |
| ENSDARG00000095281 | 24  | 9841893  | 9850767  | -      | zgc:152652        |
| ENSDARG00000078256 | 21  | 25588421 | 25594777 | +      | OVOL1             |
| ENSDARG00000056443 | 3   | 2452805  | 2459471  | -      | zgc:152753        |
| ENSDARG00000039243 | 13  | 37491630 | 37494400 | -      | zgc:152791        |
| ENSDARG00000099197 | 17  | 117124   | 124703   | -      | actc1b            |
| ENSDARG00000089602 | 3   | 4032082  | 4043655  | -      | si:dkey-217f16,1  |
| ENSDARG00000099243 | 15  | 32885186 | 32889721 | +      | CR855389,1        |
| ENSDARG00000100333 | 7   | 71156956 | 71164331 | -      | FO818712,1        |
| ENSDARG00000053254 | 3   | 32681334 | 32686893 | -      | mylpfa            |
| ENSDARG00000059139 | 12  | 798373   | 802502   | +      | WFIKKN2           |
| ENSDARG00000045423 | 24  | 9887515  | 9890368  | +      | BX571823,1        |
| ENSDARG00000088141 | 3   | 58785150 | 58790211 | -      | CU570684,4        |
| ENSDARG00000074749 | 9   | 40883826 | 41043134 | -      | abca12            |
| ENSDARG00000086048 | 3   | 3418659  | 3427179  | -      | si:ch211-229i14,2 |
| ENSDARG00000094171 | 22  | 14336629 | 14451352 | -      | lrp1ba            |
| ENSDARG00000040534 | 13  | 8508749  | 8511340  | +      | epcam             |
| ENSDARG00000012311 | 7   | 69588478 | 69616337 | -      | myoz2a            |

|                    |    |          |          |   |                   |
|--------------------|----|----------|----------|---|-------------------|
| ENSDARG00000097080 | 12 | 38809488 | 38856958 | + | si:ch73-181m17,1  |
| ENSDARG00000054103 | 21 | 37919751 | 37926113 | - | rippy1            |
| ENSDARG00000041433 | 20 | 46135871 | 46139685 | + | si:dkey-7c18,24   |
| ENSDARG00000067567 | 25 | 1710156  | 1736007  | - | SLC6A13           |
| ENSDARG00000069251 | 20 | 43839944 | 43846622 | - | si:dkeyp-50f7,2   |
| ENSDARG00000090015 | 3  | 2194988  | 2237911  | + | BX321875,1        |
| ENSDARG00000091715 | 7  | 781251   | 815299   | + | si:dkey-162h11,2  |
| ENSDARG00000083753 | 6  | 54074414 | 54074548 | + | 5S_rRNA           |
| ENSDARG00000063347 | 12 | 4361435  | 4397134  | - | TRPM4             |
| ENSDARG00000036237 | 18 | 62932    | 73844    | + | slc27a2a          |
| ENSDARG00000088937 | 10 | 35397206 | 35419988 | + | ADGRG2            |
| ENSDARG00000103392 | 11 | 12187674 | 12187970 | + | Metazoa_SRP       |
| ENSDARG00000038428 | 24 | 19374132 | 19443129 | + | sulf1             |
| ENSDARG00000097727 | 15 | 22262127 | 22267507 | - | si:ch211-286b4,3  |
| ENSDARG00000034757 | 14 | 30086638 | 30111904 | - | zdhhc2            |
| ENSDARG00000016112 | 14 | 1342084  | 1349806  | + | bbs12             |
| ENSDARG00000101380 | 5  | 56971337 | 56980781 | + | cryabb            |
| ENSDARG00000008849 | 18 | 6179082  | 6266244  | + | ptprq             |
| ENSDARG00000101901 | 5  | 56951195 | 56953707 | - | zgc:193711        |
| ENSDARG00000102713 | 4  | 69248343 | 69268517 | - | si:ch211-205a14,1 |
| ENSDARG00000077673 | 15 | 41962105 | 41973354 | + | wu:fb15h11        |
| ENSDARG00000077134 | 24 | 6365857  | 6472080  | - | gpr158a           |
| ENSDARG00000010957 | 12 | 10161281 | 10262258 | - | mpp2b             |
| ENSDARG00000018351 | 5  | 2544820  | 2582076  | + | hpda              |
| ENSDARG00000103324 | 4  | 68765919 | 69053224 | + | si:dkey-254e13,6  |
| ENSDARG00000096775 | 20 | 24232973 | 24239462 | + | si:ch211-225h9,2  |
| ENSDARG00000097611 | 22 | 34652091 | 34678717 | + | si:ch73-304f21,2  |
| ENSDARG00000098881 | 11 | 30904132 | 30915517 | - | si:dkey-238i5,3   |
| ENSDARG00000078976 | 14 | 4810207  | 4811015  | + | nanos1            |

|                    |    |          |          |   |                   |
|--------------------|----|----------|----------|---|-------------------|
| ENSDARG00000013022 | 22 | 7664593  | 7670333  | - | si:ch211-59h6,1   |
| ENSDARG00000093349 | 9  | 19870700 | 20052181 | - | si:ch211-141e20,2 |
| ENSDARG00000052450 | 5  | 56958990 | 56971040 | - | hsqb2             |
| ENSDARG00000074052 | 1  | 48880007 | 48896858 | - | si:ch211-281g13,5 |
| ENSDARG00000063435 | 12 | 4358014  | 4497181  | - | trpm4b,2          |
| ENSDARG00000075864 | 10 | 19069384 | 19135185 | + | igsf9a            |
| ENSDARG00000087133 | 11 | 9823657  | 10001798 | - | nlg1              |
| ENSDARG00000096904 | 23 | 16556526 | 16558847 | - | si:dkeyp-100a5,4  |
| ENSDARG00000093214 | 5  | 37593300 | 37596927 | - | si:ch211-284e13,9 |
| ENSDARG00000054096 | 21 | 37965371 | 37983432 | - | rbm41             |
| ENSDARG00000076826 | 24 | 6658375  | 6868565  | - | dpp6a             |
| ENSDARG00000021455 | 10 | 9878451  | 10059882 | - | strbp             |
| ENSDARG00000090468 | 4  | 6563794  | 6572040  | + | ppp1r3aa          |
| ENSDARG00000086628 | 3  | 56534393 | 56549661 | - | stk19             |
| ENSDARG00000027618 | 22 | 31258604 | 31517396 | + | grip2b            |
| ENSDARG00000103026 | 22 | 24362719 | 24455169 | + | p3h2              |
| ENSDARG00000069467 | 21 | 24658367 | 24828849 | - | igsf9bb           |
| ENSDARG00000071001 | 19 | 7919719  | 7942355  | + | NUGGC             |
| ENSDARG00000102123 | 4  | 223161   | 240969   | - | phtf2             |
| ENSDARG00000087013 | 24 | 32120983 | 32235633 | - | cubn              |
| ENSDARG00000098176 | 21 | 2077340  | 2124410  | - | si:rp71-1h20,5    |
| ENSDARG00000103590 | 23 | 42350569 | 42364992 | + | cyp2aa6           |
| ENSDARG00000023822 | 7  | 14946420 | 15004253 | - | zgc:73349         |
| ENSDARG00000088959 | 9  | 19812494 | 19846653 | + | pdxka             |
| ENSDARG00000098204 | 9  | 561485   | 582765   | + | CU984600,2        |
| ENSDARG00000078404 | 23 | 970881   | 1008485  | - | CDH26             |
| ENSDARG00000052958 | 8  | 48620752 | 48621775 | + | nppb              |
| ENSDARG00000056453 | 21 | 30381339 | 30431210 | - | afap1l1b          |
| ENSDARG00000001470 | 1  | 46334486 | 46430897 | - | mhc1zea           |

|                    |    |          |          |   |                   |
|--------------------|----|----------|----------|---|-------------------|
| ENSDARG00000052097 | 3  | 5628956  | 5645579  | - | trim35-31         |
| ENSDARG00000021688 | 1  | 6878883  | 6898529  | - | mx                |
| ENSDARG00000061685 | 18 | 1112470  | 1251622  | - | hcn4              |
| ENSDARG00000099959 | 24 | 40956288 | 40968424 | - | smyhc1            |
| ENSDARG00000094984 | 22 | 17442088 | 17472080 | - | si:ch211-197g15,8 |
| ENSDARG00000102019 | 21 | 2112832  | 2116485  | - | si:rp71-1h20,3    |
| ENSDARG00000041092 | 18 | 20880857 | 20886357 | + | pgpep1l           |
| ENSDARG00000105088 | 15 | 10079804 | 10533156 | - | tenm4             |
| ENSDARG00000102356 | 23 | 41935799 | 41959885 | + | scp2b             |
| ENSDARG00000005050 | 6  | 48254690 | 48272928 | + | wnt2ba            |
| ENSDARG00000087844 | 23 | 23305585 | 23326117 | + | plekhn1           |
| ENSDARG00000077468 | 24 | 5176384  | 5183153  | + | si:ch73-206p6,1   |
| ENSDARG00000070590 | 17 | 43547312 | 43567956 | - | nt5c1ab           |
| ENSDARG00000021242 | 3  | 15558619 | 15584730 | - | mvp               |
| ENSDARG00000074548 | 23 | 24311497 | 24326681 | - | zbtb17            |
| ENSDARG00000104365 | 2  | 31800954 | 31802920 | + | si:dkeyp-13d12,2  |
| ENSDARG00000031588 | 12 | 38755162 | 38800368 | + | si:dkey-239b22,1  |
| ENSDARG00000070826 | 25 | 20021812 | 20029433 | + | bpgm              |
| ENSDARG00000077176 | 16 | 13964919 | 13969044 | + | zgc:174888        |
| ENSDARG00000018984 | 6  | 55925603 | 56013158 | - | eya2              |
| ENSDARG00000020656 | 13 | 40689122 | 40833599 | + | prkg1a            |
| ENSDARG00000002656 | 20 | 31843070 | 32003089 | - | stxbp5a           |
| ENSDARG00000076919 | 7  | 31357396 | 31488472 | - | igdcc4            |
| ENSDARG00000025089 | 13 | 40056597 | 40112923 | - | loxl4             |
| ENSDARG00000090986 | 14 | 8332194  | 8395765  | + | CENPF             |
| ENSDARG00000009870 | 12 | 2470786  | 2487770  | - | mapk8b            |
| ENSDARG00000016527 | 6  | 58575577 | 58621300 | + | helz2             |
| ENSDARG00000069471 | 1  | 46449556 | 46460558 | - | mhc1zca           |
| ENSDARG00000070387 | 25 | 36711529 | 36713811 | - | nudt7             |

|                    |    |          |          |   |                  |
|--------------------|----|----------|----------|---|------------------|
| ENSDARG00000043238 | 15 | 5483541  | 5575763  | - | atg16l2          |
| ENSDARG00000101178 | 14 | 23631267 | 23672802 | + | SH3RF2           |
| ENSDARG00000009040 | 3  | 17874235 | 17881198 | - | si:ch73-141c7,1  |
| ENSDARG00000059252 | 17 | 25309960 | 25313056 | - | zpcx             |
| ENSDARG00000087575 | 3  | 24521885 | 24530232 | + | URGCP-MRPS24     |
| ENSDARG00000074677 | 1  | 34882062 | 34921533 | - | frem3            |
| ENSDARG00000062325 | 25 | 14069047 | 14269677 | + | shank2           |
| ENSDARG00000100280 | 6  | 57401437 | 57434665 | - | znfx1            |
| ENSDARG00000061746 | 5  | 21435933 | 21497253 | - | arhgef9a         |
| ENSDARG00000009123 | 20 | 34066551 | 34074289 | - | sele             |
| ENSDARG00000005749 | 22 | 31096349 | 31110475 | - | cand2            |
| ENSDARG00000073699 | 11 | 11291319 | 11317662 | - | col9a1a          |
| ENSDARG00000043249 | 21 | 45674662 | 45800677 | - | irf1b            |
| ENSDARG00000045947 | 12 | 4340966  | 4444705  | - | hrc              |
| ENSDARG00000101471 | 18 | 12168574 | 12260806 | + | fgd4a            |
| ENSDARG00000104139 | 16 | 10885786 | 10930006 | + | atp1a3b          |
| ENSDARG00000076411 | 3  | 16826295 | 16862540 | + | ptrfa            |
| ENSDARG00000102126 | 8  | 9072487  | 9072605  | + | 5S_rRNA          |
| ENSDARG00000102987 | 16 | 36159258 | 36188051 | - | capn7            |
| ENSDARG00000086746 | 21 | 5781884  | 5816502  | + | si:ch73-209e20,3 |
| ENSDARG00000027797 | 23 | 26870469 | 26961676 | - | adcy6b           |
| ENSDARG00000074829 | 16 | 12626633 | 12669820 | + | rasip1           |
| ENSDARG00000074079 | 9  | 37136545 | 37149379 | + | si:dkey-3d4,3    |
| ENSDARG00000008030 | 6  | 1641806  | 1664198  | + | myl9b            |
| ENSDARG00000076529 | 10 | 4095573  | 4116145  | + | mn1a             |
| ENSDARG00000077054 | 14 | 35536562 | 35544041 | - | fam198b          |
| ENSDARG00000100870 | 9  | 51243130 | 51251502 | - | CABZ01053748,1   |
| ENSDARG00000013415 | 16 | 30562910 | 30606392 | - | lmna             |
| ENSDARG00000006598 | 16 | 26656984 | 26663672 | - | sgk2b            |

|                    |    |          |          |   |                 |
|--------------------|----|----------|----------|---|-----------------|
| ENSDARG00000103542 | 16 | 4458253  | 4488590  | - | vegfaa          |
| ENSDARG00000040777 | 9  | 37157499 | 37165084 | + | inhbb           |
| ENSDARG00000075282 | 9  | 8450909  | 8475541  | - | irs2b           |
| ENSDARG00000012674 | 11 | 17830054 | 17860142 | + | rpusd4          |
| ENSDARG00000096562 | 12 | 554562   | 622546   | - | wu:fj29h11      |
| ENSDARG00000043821 | 9  | 28530363 | 28588325 | - | klf7b           |
| ENSDARG00000079378 | 15 | 18012375 | 18159971 | - | phldb1b         |
| ENSDARG00000011571 | 6  | 11445584 | 11469253 | + | calcr1b         |
| ENSDARG00000102416 | 16 | 36395410 | 36400391 | + | CR974440,1      |
| ENSDARG00000073911 | 14 | 33096823 | 33114362 | - | tmem255a        |
| ENSDARG00000016439 | 10 | 24476246 | 24524019 | + | slc7a1          |
| ENSDARG00000031702 | 12 | 6325145  | 6418106  | + | prkg1b          |
| ENSDARG00000079900 | 7  | 24458401 | 24541867 | + | shroom4         |
| ENSDARG00000092166 | 23 | 16962809 | 16991848 | + | si:dkey-147f3,8 |
| ENSDARG00000091293 | 18 | 39688247 | 39797228 | - | dmxl2           |
| ENSDARG00000088699 | 17 | 23800426 | 23875002 | - | pdzd8           |
| ENSDARG00000004115 | 14 | 16178273 | 16448609 | - | mgat4b          |
| ENSDARG00000103551 | 12 | 36193087 | 36242090 | - | rnf213b         |
| ENSDARG00000055678 | 20 | 26509747 | 26568217 | - | akap12b         |
| ENSDARG00000042210 | 18 | 9354098  | 9470930  | + | sema3ab         |
| ENSDARG00000099717 | 21 | 2066071  | 2075568  | + | si:rp71-1h20,9  |

**Supplementary table 5.** Gene list related to the heatmap depicted in Fig. 7 panel A.

kel  
atf5a  
klf1  
ASTE1  
epor  
nmt1b  
tal1  
hif1al2  
si:ch211-262i1.3  
si:dkey-106c17.3  
shag  
SLC29A1  
plagl2  
tb celb  
col 18a1  
sema3b  
chl1a  
gata1a  
si:ch211-227m13.1  
si:ch211-117i20.2  
sh3bp5b  
add2  
sh3bp5b  
atxn1b  
rhd  
gp1bb  
ggact.2  
cyp4v7  
slc4a1a

rell2

tubb1

si:dkey-25o16.2

si:ch211-207b24.4

slc16a10

kcnj5

chrn2a

alas2

rbm 38

si:dkey-93h22.7

tmod4

slc25a37

cahz

rfesd

igfbp1a

vtg1

vtg7

vtg5

vtg2

nppb

si:dkey-208m12.2



**Supplementary table 6.** List of forward and reverse primers.

| organism | Gene    | Forward 5' - 3'           | Reverse 5' - 3'          |
|----------|---------|---------------------------|--------------------------|
| Dre      | dnmt1   | GGGCTACCAGTGCACCTTTG      | GATGATAGCTCTGCGTCGAGTC   |
|          | dnmt3a2 | TAGGAAAGGCTTGTTTGAGGG     | GCGTGAGATGTCTTTCTTGTC    |
|          | dnmt3b2 | CGCTACATTGCCTCTGAGA       | GCCAGATGTTTCTAGTGATG     |
|          | epoa    | TTGCCTTACTGCTGATGGTG      | TGACTGGACCTCTGAGCTT      |
|          | hk2     | CGGCGTCTGAATAAGATGGT      | TGGCGTTGTTGTGTGTTTTT     |
|          | hmox1a  | CAGCCCATTACTTCCCTCA       | GGACTGCTCTTGCCAATCTC     |
|          | ldha    | TCACCCGGTTTCTACTTTGG      | CTGAACACCCCAAGGTCT       |
|          | p27     | GAAGGGCTCCGATATTCACA      | CACGATGAGTCGAGACAGGA     |
|          | col1a1  | CAGACTCCACCTGCTTATTCTACAC | TTGACATCGCCCCTATGGACGTTG |
|          | col1a2  | CATGAGGTAGTTTAAACCTTACGG  | GGACATTGGCCCAGTCTGTTTCAA |
|          | col15   | GATTCGAGGGTTCTGGTGA       | ATACACCTGGCTCACCTTG      |
|          | actc1b  | GATCTGGCACCACACCTTCT      | CTCATAGACGGGGACGTTGT     |
|          | cahz    | AAGTATGACCCAGCCACCAC      | GTCATCACTGCTTCCCCAAT     |
|          | chata   | ACAATCCTCAGACGGACCAC      | CAGGGAAAGGTATTGGCAGA     |
|          | fgf13a  | TACATTATGTTGCGGCAGGA      | CTTCGTTACGATCCCCTTCA     |
|          | gata1a  | TTTCACCTCCCCCAAAGAG       | TGGACTIONCAGCATGTGTGGA   |
|          | hif1al2 | TCTTTGAATGGCAAGGTCATC     | CCAACCAGTCAGTTTCGTGTT    |
|          | hpda    | AGACGGCAAAAATCAAGGTG      | AGGACGGTCAGGTTTCTCT      |
|          | kdm6a   | GCATGGATGATGAACAGTGG      | AGGGGAGGTGATTGTGACTG     |
|          | smyhc1  | ACCTCATCAAGGGTTTGTGC      | CTGTTTGGTGTCCAGGGATT     |
|          | tfr1a   | ATCAAGCCAGGACAACCATC      | GCAGACAGTTTTGGGAGAGC     |
|          | tgf2bl  | ACAGAGCAGCGAGTGAAAT       | TACAGCAGGGACAGTGAACG     |
|          | wnt2ba  | GATGAAGACGGGGACTTTGA      | CTGGCATCCTTGACCATTCT     |
|          | atf2    | CAAGCATGAGATGACCCTGA      | AGTCCAGCGGCAACTTTTTA     |
|          | atf6    | TGATGTCTTCATTGCCATTCA     | TGGTTTCTCTCCATCCATCTG    |
|          | c-Jun   | CCACAAGGCTCTGAAACACA      | CACAGAACTGGGTCCGGAGT     |
|          | creb1a  | GTTCCCAGCAATCAAGTGGT      | CCTCCCTGTTCTTCATCAGC     |
|          | creb1b  | TCCAGGAGTTCCAAGAATCG      | TGGTCATGGTGAGAGTCTGC     |
|          | elk1    | GGGTCTTCGCAAGAACAAAA      | GGTTTGGTCTGGATGGACAG     |

|     |              |                         |                           |
|-----|--------------|-------------------------|---------------------------|
|     | mef2ca       | CACGGACATGGACAAAGTTCT   | TTAGACTGAGGGATGGCACAC     |
|     | mef2cb       | TGCTGTGCCCTCTTCTACCT    | AGTTGCGGTGGTTTCCATAG      |
|     | gapdh        | GTGGAGTCTACTGGTGTCTTC   | GTGCAGGAGGCATTGCTTACA     |
| Nfu | dnmt1        | GTCTCTGCCAGACGATGTCA    | GCAAGGCTTTCACCTTTGAG      |
|     | dnmt3a       | ATTTCTTCGCCAACAACCAC    | GCCCACAGTGATGGAATCTT      |
|     | dnmt3b       | CATGAGAAGGGTGGAGTGGT    | AGCTGCCAACTCGATGATCT      |
|     | col1a1       | GACCCACAGGATCTCAAGGA    | ACCACTATCACCAGCGGTTT      |
|     | col1a2       | CAAGAACAGCGTTGCCTACA    | CAATGTCCAAAGGTGCAATG      |
|     | col11a1      | ATGGAGATGCAGAGGTGGTC    | AATCCCGATGTTCTCGTCAC      |
|     | col15a1      | TACCATGCCTTTTCCAGACC    | TTCTCCTCGTTCCCTTTTT       |
|     | ir           | TGCCTCTTCAAACCTGAGT     | AGGATGGCGATCTTATCACG      |
| Hsa | dnmt1        | ATCCGAGGAGGGCTACCTG3    | CACTCCCGGTTGTAAGCAT       |
|     | dnmt3a       | AGCCAAGGTCAAGGAGATT3    | GTTCTTGCAAGTTTTGGCACA     |
|     | dnmt3b       | TCAGGATGGGAAGGAGTTTG    | CTGCAGAGACCTCGGAGAAC      |
|     | col1a1       | GAACGCGTGTATCCCTTGT     | GAACGAGGTAGTCTTTCAGCAACA3 |
|     | col3a1       | AACACGCAAGGCTGTGAGACT3  | GAACGAGGTAGTCTTTCAGCAACA  |
|     | col11        | GGTCTGCAGTCGCAATTTCCG   | CCACCTAGAGGACCACGGCT      |
|     | col15        | AGGCCCTGGATGCACAATG     | GACCAATTGCCGTTGG          |
|     | pri-miR-29ab | TGAATGTGTGAGTTCTTGGAAGT | GATCCCCAAGCGCAGGACT       |
|     | pri-miR-29bc | AGATTTGCATTGACGTCCGG    | CCAGGCTAAGGATCAGCTCA      |
|     | p0           | TCGACAATGGCAGCATCTAC    | ATCCGTCTCCACAGACAAGG      |
